# Supplementary material
Source: Springer Nature journal article supplement (https://www.springermedizin.de/resource/supplementary/13000_2010_339_MOESM3_ESM.pdf/9624310)

- 2007/2008 academic year
- 2009/2010 academic year - students
- 2009/2010 academic year - tutors

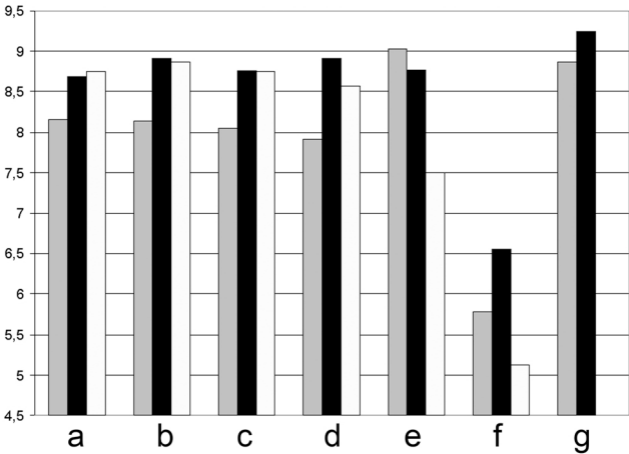

Supplement: MOESM3 [file 9624310]
